# Supplementary material
Source: PubMed Central journal article supplement (PMC5328147)

Supplementary Figure 1

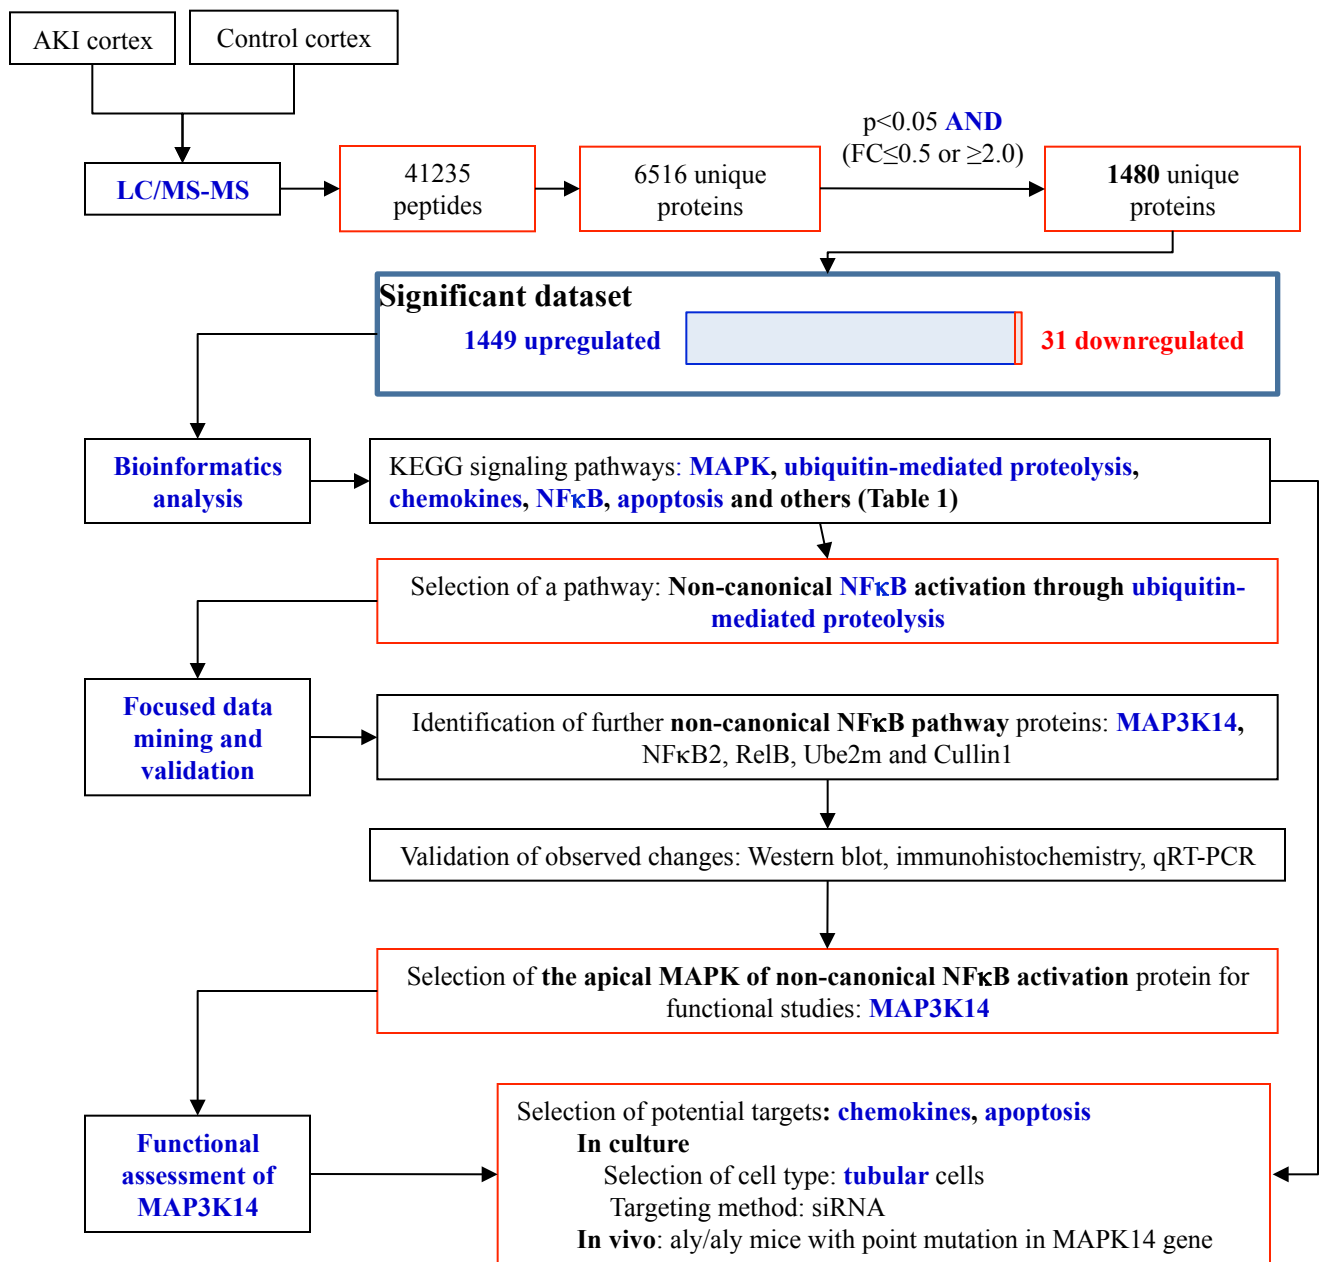

Supplementary Figure 2

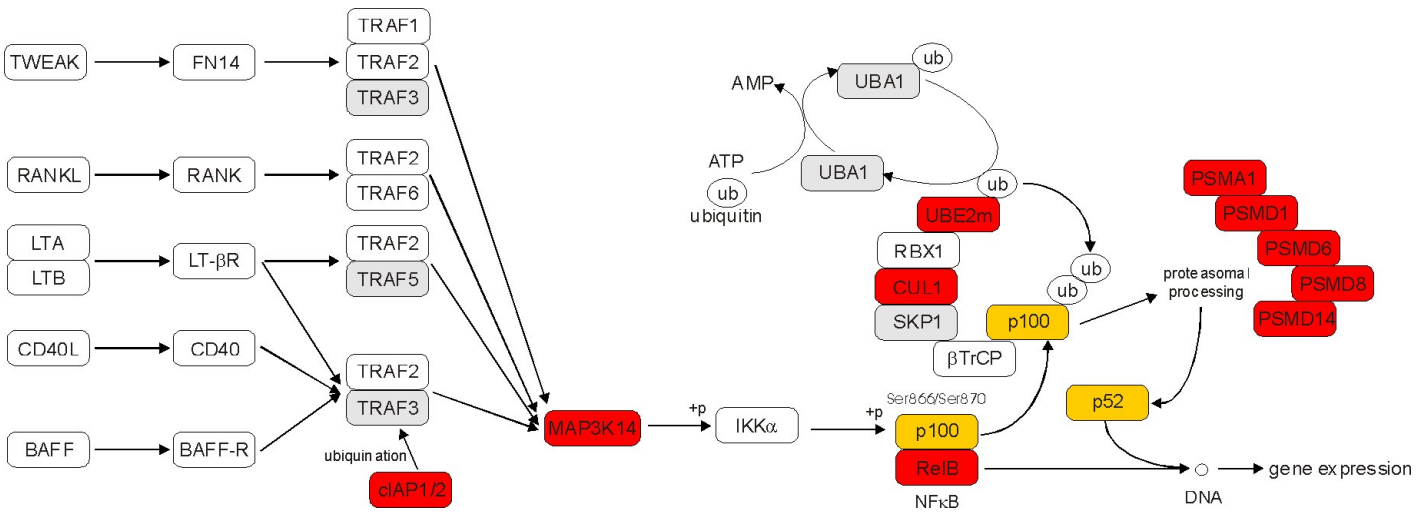

### Supplementary Figure 3

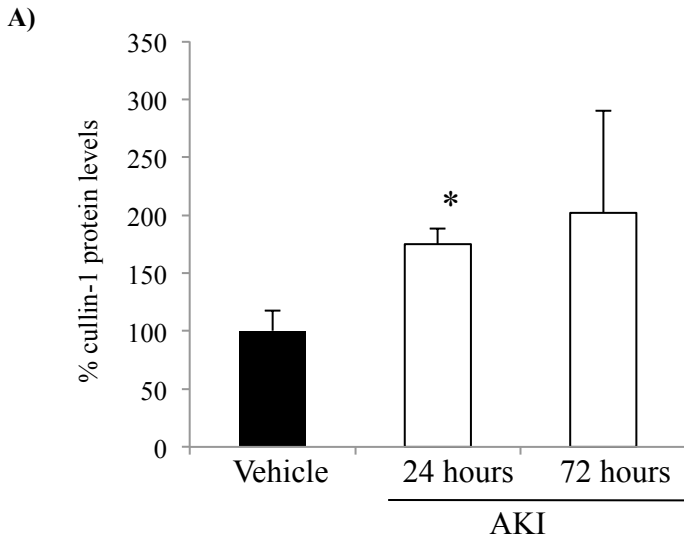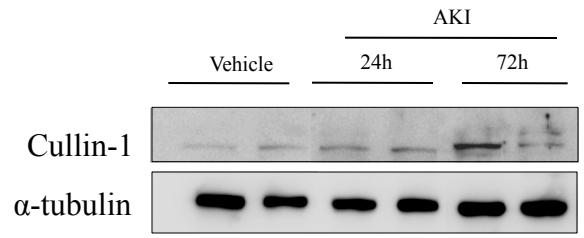

B)

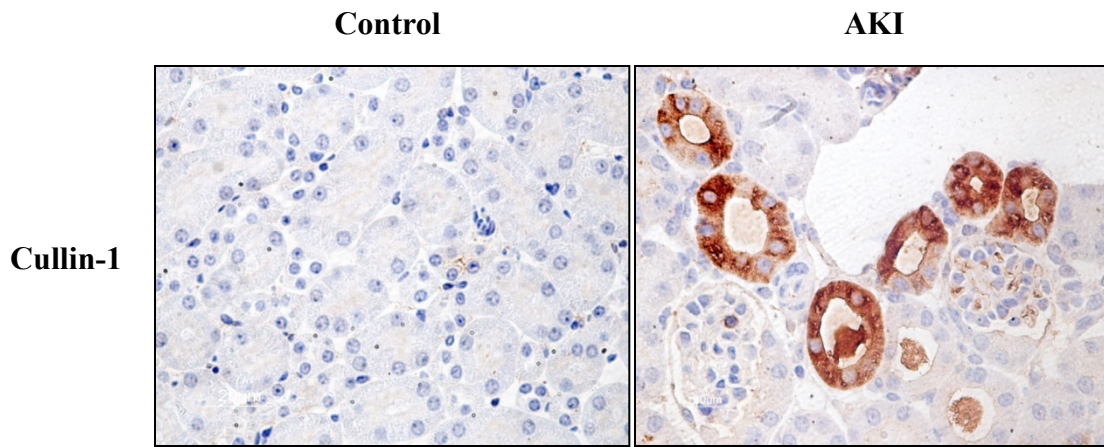

# Supplementary Figure 4

■ MAP3K14<sup>+/+</sup>  
□ MAP3K14<sup>aly/aly</sup>

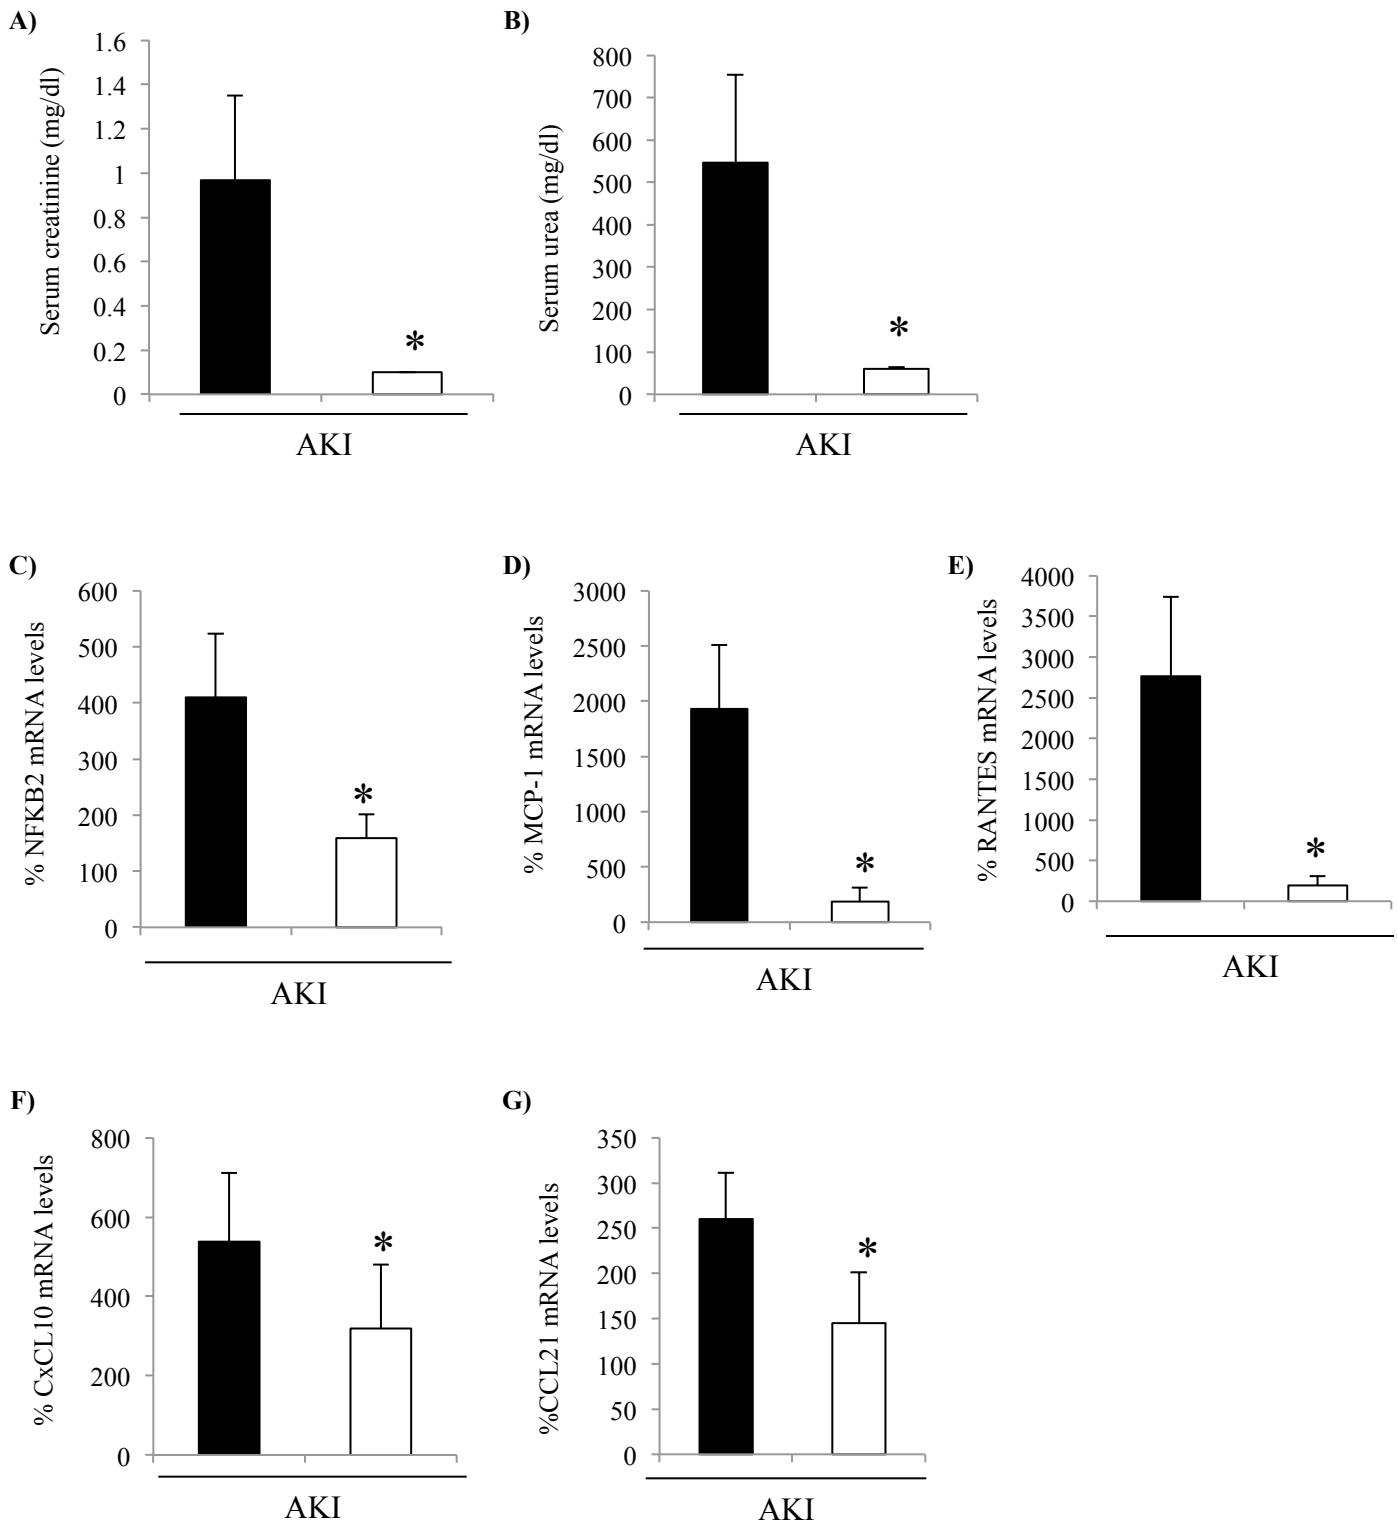

# Supplementary Figure 5

A)

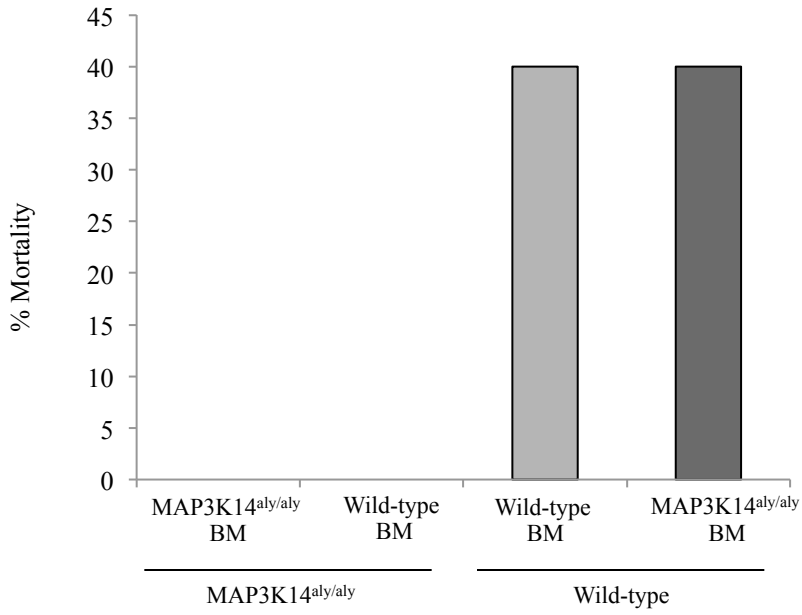

B)

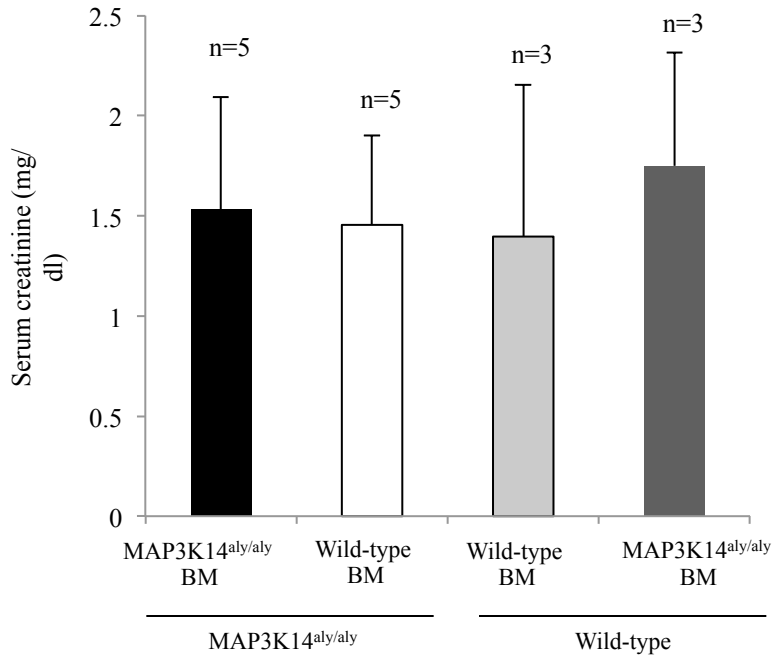

**Supplementary Figure 6**

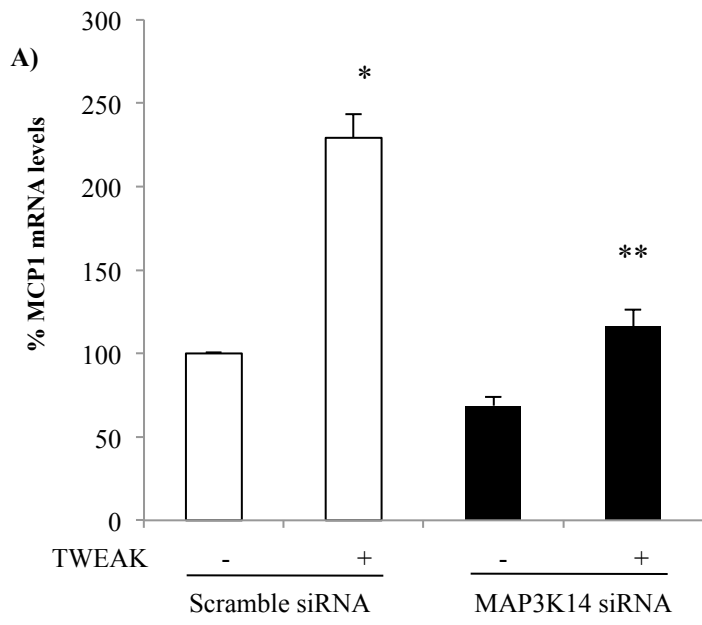

Supplement: ASN.2015080898SupplementaryData.pdf [file ASN.2015080898SupplementaryData.pdf]
